# Supplementary material for: Aster swarming by symmetry breaking of cortical dynein transport and coupling kinesins
Source: Royal Society of Chemistry journal article supplement (doi:10.1039/d0sm01086c), 2020-01-01
Supplement: d0sm01086c1.pdf [file d0sm01086c1.pdf]

## Supporting Information

### S1. Numerical simulations and data analysis

Simulation code was based on C++ code of Cytosim, an Open-Source agent based simulation engine for cytoskeletal mechanics<sup>1</sup>. A typical simulation run with 20 asters and 7070 kinesin and 9500 dynein motors in a cell of radius 15  $\mu\text{m}$  for 300 s required  $\approx 200$  minutes on a 12 core Intel machine (Xeon E5 2630) running Linux (Ubuntu 14.04) with 15.6 GB memory. The source code and parameter files have been deposited as Open-Source in a GitHub repository <https://github.com/CyCellsLab/Multi-aster-swarming>. All data analysis and plotting were performed in MATLAB R2017a (Mathworks Inc., USA). For clustering analysis, custom made Python scripts was written using scikit-learn package<sup>2</sup>. Heirarchical clustering (k-means) was performed using angular velocity, coherence order parameter and switching frequency as features. The silhouette score for 3 clusters of 0.58 was higher than for 2 or 4 clusters and used to determine the clusters in variable space (Figure S1). The labels of each cluster were then used to determine color classes of aster motility (Figure ??).

Table SI 1 MT parameters. The microtubule and aster parameters used in simulations were taken from experimental measurements reported in literature, and where missing estimated.

| Parameter     | Description              | Value                             | Reference     |
|---------------|--------------------------|-----------------------------------|---------------|
| $f_c$         | Frequency of catastrophe | 0.049 (s <sup>-1</sup> ), varied  | 3, this study |
| $f_r$         | Frequency of rescue      | 0.0048 (s <sup>-1</sup> ), varied | 3, this study |
| $v_g$         | Growth velocity          | 0.196 ( $\mu\text{m/s}$ )         | 3             |
| $v_s$         | Shrinkage velocity       | 0.325 ( $\mu\text{m/s}$ )         | 3             |
| $\kappa$      | MT bending modulus       | 20 (N/m <sup>2</sup> )            | 4             |
| <b>Aster:</b> |                          |                                   |               |
| $N_a$         | Number of asters         | 20, varied                        | This study    |
| $N_{MT}$      | Number of MTs/aster      | 40                                | This study    |

Table SI 2 Transition frequencies and MT flux rates. The parameters of MT dynamic instability: frequency of catastrophe ( $f_c$ , s<sup>-1</sup>) and frequency of rescue ( $f_r$ , s<sup>-1</sup>) was varied to obtain different MT flux rates (J) at constant value of growth velocity ( $v_g = 0.196 \mu\text{m/s}$ ), shrinkage velocity ( $v_s = 0.325 \mu\text{m/s}$ ) and mean MT length ( $L_{MT} = 4.25 \mu\text{m}$ ). The values were reported previously in<sup>3,5</sup>.

| $f_c$ (s <sup>-1</sup> ) | $f_r$ (s <sup>-1</sup> ) | J ( $\mu\text{m/s}$ ) |
|--------------------------|--------------------------|-----------------------|
| <b>Stabilized:</b>       |                          |                       |
| None                     | None                     | 0                     |
| <b>Dynamic:</b>          |                          |                       |
| 20.2683                  | 33.5317                  | -0.0003               |
| 2.0527                   | 3.3273                   | -0.0028               |
| 0.2312                   | 0.3068                   | -0.0279               |
| 0.049                    | 0.0048                   | -0.2785               |

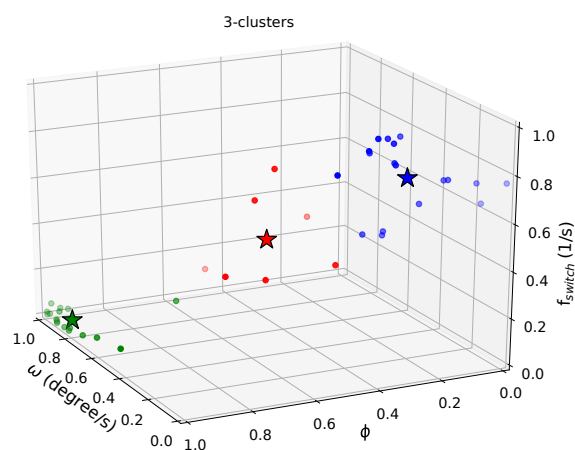

Figure S1 Clusters of motility patterns for varying number of motors per aster and degree of uniformity at the cortex. The parameter space for varying aster density and dynein diffusion coefficient was segregated into clusters using k-means clustering based on the measures of average angular velocity ( $\omega$ ), coherence in rotation ( $\phi$ ) and frequency of switching ( $f_{\text{switch}}$ ). The circles correspond to points in the parameter space and color represents the clusters: (green) sustained, (red) coherent and persistent rotation and (blue) for coherent rotation with variable persistence and a lack of sustained rotation. The 'stars' indicate the centroid of the clusters. Cell size  $R = 11 \mu\text{m}$ , cortical dynein density = 100 motors/ $\mu\text{m}$  and cytoplasmic kinesin-5 density = 10 motors/ $\mu\text{m}^2$ .

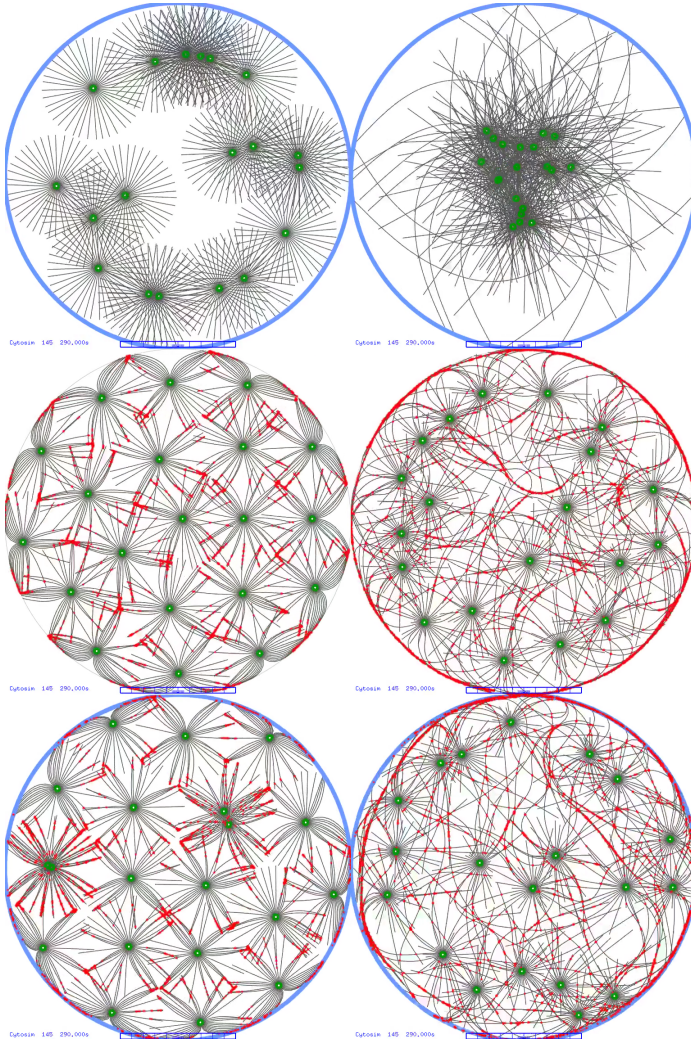

Video SV1 The effect of (*top row*) cortical force generators, (*mid-row*) kinesin complexes and (*bottom row*) both kinds of motors on MT asters with the two columns simulating MTs lengths as (*left*) fixed (*right*) dynamically unstable. The video corresponds to results depicted in Figure 1. Time is 300 s,  $N_a = 20$ ,  $\rho_d = 100$  motors/ $\mu\text{m}$ ,  $\rho_k = 10$  motors/ $\mu\text{m}^2$ ,  $J = 0$  and  $-0.3 \mu\text{m/s}$  for stabilized and dynamic MTs.

## Notes and references

- 1 F. Nedelec and D. Foethke, *New Journal of Physics*, 2007, **9**, 427.
- 2 F. Pedregosa, G. Varoquaux, A. Gramfort, V. Michel, B. Thirion, O. Grisel, M. Blondel, P. Prettenhofer, R. Weiss, V. Dubourg, J. Vanderplas, A. Passos, D. Cournapeau, M. Brucher, M. Perrot and E. Duchesnay, *Journal of Machine Learning Research*, 2011, **12**, 2825–2830.
- 3 C. A. Athale, A. Dinarina, M. Mora-Coral, C. Pugieux, F. Nedelec and E. Karsenti, *Science*, 2008, **322**, 1243–1247.
- 4 F. Gittes, B. Mickey, J. Nettleton and J. Howard, *J. Cell Biol.*, 1993, **120**, 923–934.
- 5 F. Verde, M. Dogterom, E. Stelzer, E. Karsenti and S. Leibler, *J. Cell Biol.*, 1992, **118**, 1097–1108.
